# Supplementary material for: Mesoscopic Organization Reveals the Constraints Governing Caenorhabditis elegans Nervous System
Source: PubMed Central journal article supplement (PMC2825259; doi:10.1371/journal.pone.0009240), 2010-02-22

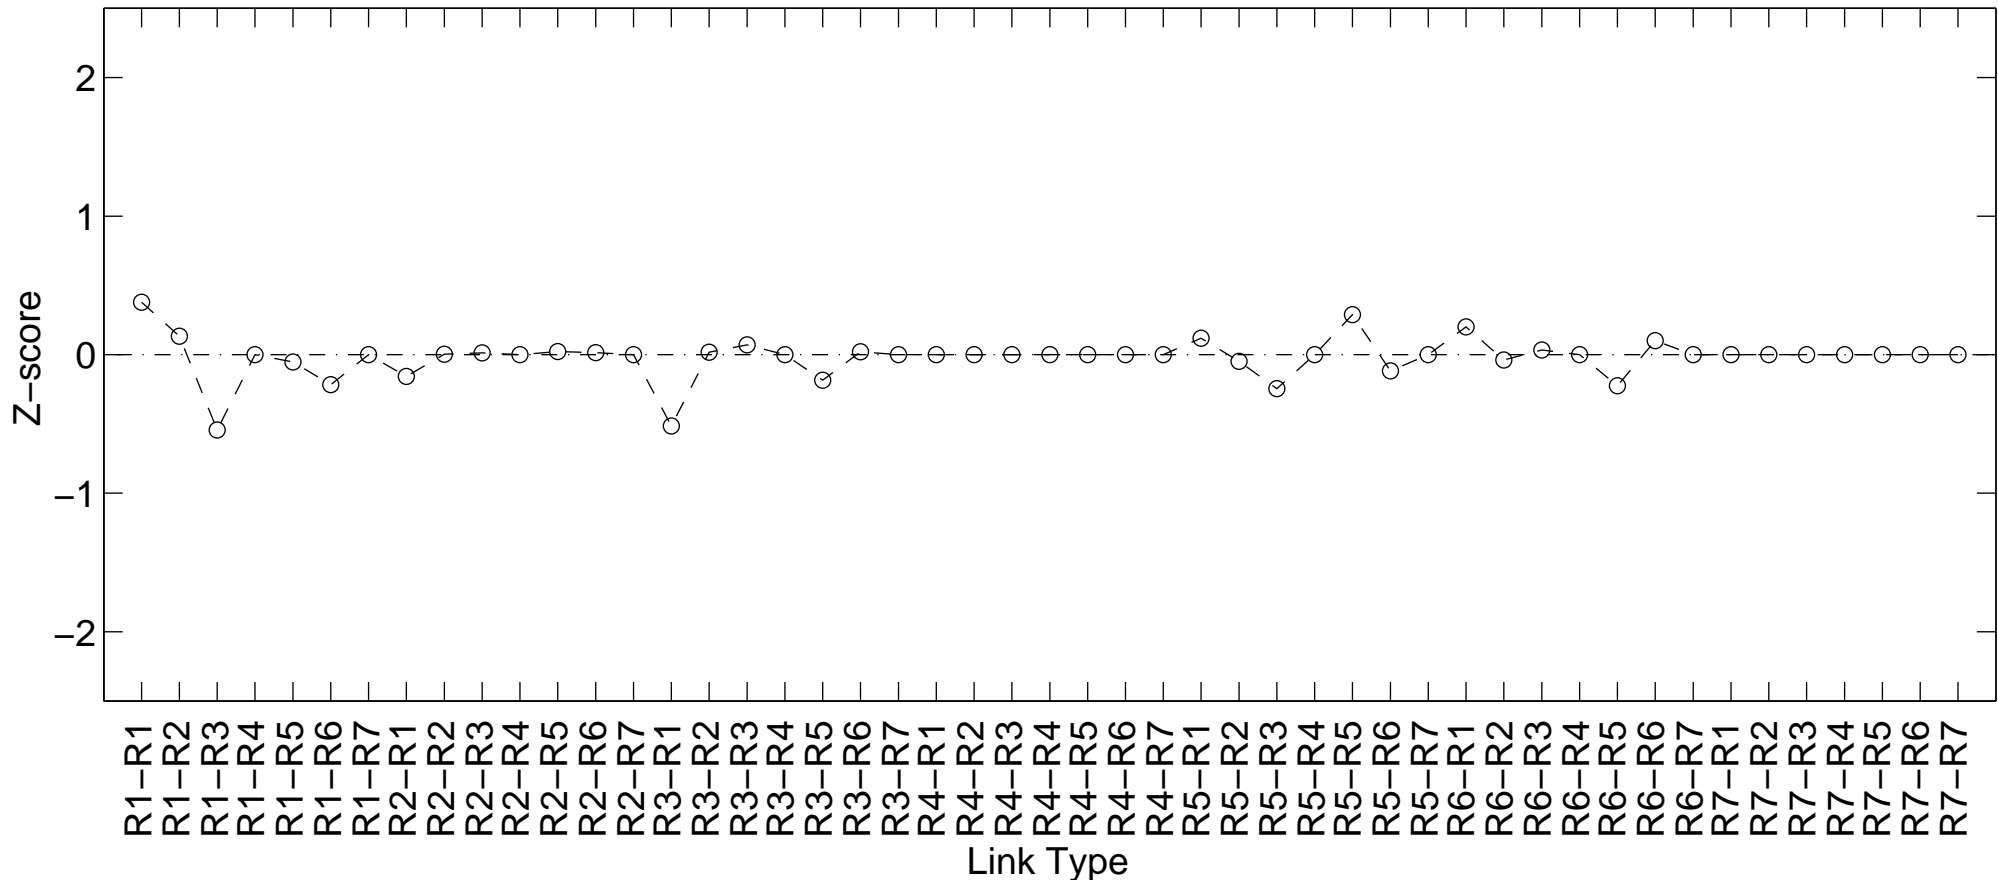

Supplement: pone.0009240.s004.pdf [file pone.0009240.s004.pdf]
