# Supplementary material for: Mesoscopic Organization Reveals the Constraints Governing Caenorhabditis elegans Nervous System
Source: PLoS One. 2010 Feb 22;5(2):e9240. doi: 10.1371/journal.pone.0009240 (PMC2825259; doi:10.1371/journal.pone.0009240)
Supplement: Table S2 — The neuronal composition of different functional circuits in the C. elegans somatic nervous system. (0.02 MB XLS) [file pone.0009240.s006.xls]

## Sheet: Sheet1
The neuronal composition of different functional circuits in the C. elegans somatic nervous system
F1	F2	F3	F4	F5	F6	F7
Mechanosensation	Egg laying	Thermotaxis	Chemosensation	Feeding	Exploration	Tap withdrawal
CEPVL/R	ASKL/R	AFDL/R	ADFL/R	ADLL/R	ASIL/R	AVAL/R
CEPDL/R	AVJL/R	ASEL/R	ADLL/R	AIBL/R	RIML/R	AVBL/R
ASHL/R	AWCL/R	AVAL/R	AIBL/R	AIZL/R	AIYL/R	AVDL/R
AVAL/R	AIAL/R	AVBL/R	AIZL/R	ASKL/R		ALML/R
AVBL/R	AVFL/R	AVEL/R	ASEL/R	AWAL/R		AVM
AVDL/R	HSNL/R	RIAL/R	ASGL/R	AWCL/R		PVDL/R
AVEL/R	VC1	RIBL/R	ASHL/R	RIBL/R		DVA
ADEL/R	VC2	RIML/R	ASIL/R			PLML/R
ALML/R	VC3		ASJL/R			PVCL/R
AVM	VC4		ASKL/R
PDEL/R	VC5		AVAL/R
PVDL/R	VC6		AVBL/R
PVM			AVEL/R
PLML/R			AWAL/R
PVCL/R			AWBL/R
			AWCL/R
			RIBL/R
			AIAL/R
			AIYL/R
